# Supplementary material
Source: publisher figshare collection journal article supplement (https://plos.figshare.com/articles/dataset/_/4049703)
Supplement: Supplementary file [file 1]

# ***Schistosoma* spp. Life Cycle Training Course**

**April 13-15, 2016**

**Schistosomiasis Resource Center  
Biomedical Research Institute  
12111 Parklawn Drive Rockville, MD 20852**

**Wednesday, April 13** (Lectures held in Room 103, lab procedures in Room 213)

|               |                                                                                                                              |                                       |
|---------------|------------------------------------------------------------------------------------------------------------------------------|---------------------------------------|
| 9:00-9:15AM   | <b>Meet and Greet</b><br>SRC Staff<br>Life Cycle Course Attendees                                                            | Room 103                              |
| 9:15-9:20AM   | <b>Welcome to BRI</b><br>Paul Nisson, PhD<br>Executive Director                                                              | Room 103                              |
| 9:30-10:00AM  | <b>Schistosomiasis pathology in the field and in the lab</b><br>Michael Hsieh, MD, PhD<br>Principal Investigator, BRI        | Room 103                              |
| 10:00-10:30AM | <b><i>Biomphalaria glabrata</i> maintenance</b><br>André Miller                                                              | Room 103                              |
| 10:30-11:00AM | <b><i>Bulinus truncatus</i> and <i>Oncomelania hupensis</i> maintenance</b><br>Sarah Li                                      | Room 103                              |
| 11:00-11:30AM | <b>Maintaining <i>S.mansoni</i> in the laboratory</b><br>Kenia Villatoro-Benitez                                             | Room 103                              |
| 11:30-11:50AM | <b>Perfusions: collecting adult worms from <i>S.mansoni</i>-infected mice</b><br>André Miller                                | Room 103                              |
| 11:50-12:30PM | <b>LUNCH</b>                                                                                                                 |                                       |
| 12:30-1:00PM  | <b>Tour of <i>B.glabrata</i>, <i>O. hupensis</i> and <i>B.truncatus</i> colonies</b><br>Kenia Villatoro Benitez<br>Sarah Li  | Room 213 SRC                          |
| 1:-3:30PM     | <b>Perfusions of <i>S.mansoni</i>-infected mice to collect adult schistosomes</b><br>André Miller<br>Kenia Villatoro Benitez | Room 213 SRC<br>Student participation |
| 3:30PM        | <b>DISMISSAL</b>                                                                                                             |                                       |

# ***Schistosoma* spp. Life Cycle Training Course**

Thursday, April 14

|                |                                                                                                                                                                                                                          |                                           |
|----------------|--------------------------------------------------------------------------------------------------------------------------------------------------------------------------------------------------------------------------|-------------------------------------------|
| 9:00-9:30AM    | <b>NIH Grants and Research Resources</b><br>Glen C. McGugan, Jr, PhD<br>Program Officer<br>Parasitology and International Programs Branch<br>National Institute of Allergy and Infectious Diseases, NIH<br>Rockville, MD | Room 103                                  |
| 9:30-10:00AM   | <b>Maintaining <i>S.haematobium</i> in the laboratory: from snail to hamster and back again</b><br>Taiwo Ogunbayo                                                                                                        | Room 103                                  |
| 10:00-10:30AM  | <b>Collecting <i>S. haematobium</i> cercariae from patent <i>Bulinus</i></b><br>Sarah Li<br>Taiwo Ogunbayo                                                                                                               | Room 213 SRC                              |
| 10:30-11:00AM  | <b>Collecting <i>S. japonicum</i> cercariae from patent <i>O.hupensis</i></b><br>Sarah Li                                                                                                                                | Room 213 SRC                              |
| 11:00--12:30PM | <b>Collecting <i>S.mansoni</i> cercariae from patent <i>B.glabrata</i></b><br>Kenia Villatoro Benitez<br>André Miller                                                                                                    | Room 213 SRC Lab<br>Student participation |
| 12:30-1:30PM   | <b>LUNCH</b>                                                                                                                                                                                                             |                                           |
| 1:30-1:45PM    | <b>Percutaneous exposure of hamsters for <i>S.haematobium</i> infection</b><br>Demonstration<br>Taiwo Ogunbayo                                                                                                           | Room 208 SRC                              |
| 1:45-2:15PM    | <b>Percutaneous exposure of mice for <i>S.mansoni</i> infection</b><br>Demonstration<br>Kenia Villatoro Benitez                                                                                                          | Room 208 SRC                              |
| 2:15-3:00PM    | <b>Perfusion of <i>S.haematobium</i>-infected hamster to collect adult worms</b><br>Demonstration<br>Sarah Li and Taiwo Ogunbayo                                                                                         | Room 213 SRC                              |
| 3:00-4:00PM    | <b>Preparation of <i>in vitro</i> schistosomules of <i>S.mansoni</i></b><br>Demonstration<br>André Miller                                                                                                                | Room 213 SRC                              |
| 4:00PM         | <b>DISMISSAL</b>                                                                                                                                                                                                         |                                           |

# ***Schistosoma* spp. Life Cycle Training Course**

Friday, April 15

|               |                                                                                                                                                  |                                       |
|---------------|--------------------------------------------------------------------------------------------------------------------------------------------------|---------------------------------------|
| 9:00-10:00AM  | <b>Isolation of viable <i>S.mansoni</i> eggs from liver tissue</b><br>Kenia Villatoro Benitez<br>André Miller                                    | Room 213 SRC<br>Student participation |
| 10:00-11:30AM | <b>Hatching <i>S.mansoni</i> eggs for miracidia collection</b><br><b>Exposing snails to miracidia</b><br>Kenia Villatoro Benitez<br>André Miller | Room 213 SRC<br>Student participation |
| 11:30-12:30PM | <b>LUNCH /DISMISSAL</b><br>BRI staff available for questions                                                                                     | Room 103                              |

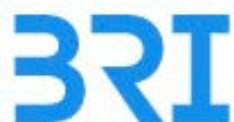

BIOMEDICAL RESEARCH INSTITUTE

## 2015 SCHISTOSOMIASIS MOLECULAR TRAINING COURSE

### Evaluation of DNA methylation of *Biomphalaria glabrata* in normal vs. thermal stress conditions

Schistosomiasis Resource Center  
Biomedical Research Institute  
Rockville, MD

July 13-15, 2015

MONDAY JULY 13

|                   |                               |                                                                                                                                                             |
|-------------------|-------------------------------|-------------------------------------------------------------------------------------------------------------------------------------------------------------|
| 9:00-9:15 AM      | Welcome to BRI                | <b>Paul Nisson, PhD</b><br>Executive Director<br>BRI                                                                                                        |
| 9:15-9:30 AM      | Introduction to BRI<br>to SRC | <b>Michael Hsieh, MD, PhD</b> / <b>MMK</b> overview of SRC<br>Principal Investigator, BRI<br><br>Welcome and introduction, BRI mission, SRC staff resources |
| 9:30-10:30 AM     | Lecture                       | <b>Michael Hsieh, MD, PhD</b> (BRI)<br>“Host DNA methylation induced by experimental urogenital Schistosomiasis”                                            |
| 10:30-10:45 AM    | Break                         |                                                                                                                                                             |
| 10:45-11:30 AM    | Lecture                       | <b>Wannaporn Ittiprasert, PhD</b> (SRC)<br>“Current epigenetic study methods focusing on invertebrates”<br><br>Experiment workflow                          |
| 11:30 AM-12.30 PM | Lunch                         |                                                                                                                                                             |
| 12:30-2:45 PM     | Lab                           | Dual DNA and RNA extraction (Ittiprasert and Miller)                                                                                                        |
| 2:45-3:00 PM      | Break                         |                                                                                                                                                             |
| 3:00-3:30 PM      | Lab                           | DNA and RNA qualification and quantification (Ittiprasert and Miller)                                                                                       |

## TUESDAY JULY 14

|                  |         |                                                                                                                                                                                                                                                           |
|------------------|---------|-----------------------------------------------------------------------------------------------------------------------------------------------------------------------------------------------------------------------------------------------------------|
| 9:00-10:15 AM    | Lab     | Determining percent quantification of DNA methylation (Ittiprasert and Miller)                                                                                                                                                                            |
| 10:15-10:45 AM   | Break   |                                                                                                                                                                                                                                                           |
| 10:45-11:15AM    | Lecture | <b>John Satterlee, Ph.D.</b><br>Program Coordinator, NIH Roadmap Epigenomics Program<br>National Institute on Drug Abuse, NIH                                                                                                                             |
| 11:15-11:45 AM   | Lecture | <b>Ankit Gupta, Ph.D.</b><br>Laboratory of Malaria and Vector Research<br>National Institute of Allergy and Infectious Diseases, NIH<br>Rockville, MD<br>“Conditional knockdown suggests <i>P.falciparum</i> CLAG3 oligomers contribute to PSAC function” |
| 11:45AM-12: 45PM | Lunch   |                                                                                                                                                                                                                                                           |
| 12:45-1:45 PM    | Lecture | <b>Jeffrey Bethony, Ph.D.</b><br>Department of Microbiology, Immunology and Tropical Medicine<br>George Washington University<br>Washington D.C.<br>“microRNA and gene regulation in helminthes”                                                          |
| 1:30-2.45 P.M.   | Lab     | Data analysis of methylation level (Ittiprasert and Miller)<br><br>Experiment for gene expression by real time PCR (Ittiprasert and Miller)                                                                                                               |

## WEDNESDAY JULY 15

|                 |         |                                                                                                                                                                  |
|-----------------|---------|------------------------------------------------------------------------------------------------------------------------------------------------------------------|
| 9:00-9:30AM     | Lecture | <b>Glen Mcgugan, Ph.D.</b><br>Program Officer, Parasitology and International Programs<br>DMID/NIAID/NIH<br>Rockville, MD<br>“NIH Grants and Research Resources” |
| 9:30-11:00 A.M. | Lab     | Gene expression and correlation analysis between DNA methylation and gene expression in <i>B. glabrata</i> snail (Ittiprasert and Miller)                        |
|                 |         | Conclusion                                                                                                                                                       |
